# Supplementary material
Source: PubMed Central journal article supplement (PMC7580647)
Supplement: Supp_Fig1-Table2.pdf [file Supp_Fig1-Table2.pdf]

## Supplementary Data

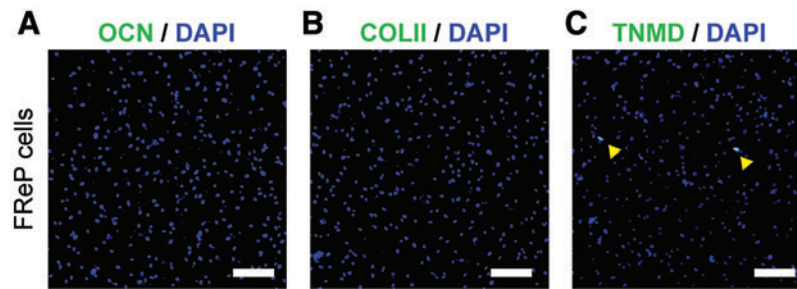

**SUPPLEMENTARY FIG. S1.** MeGC/ColII-hydrogel-encapsulated FReP cells did not commit to osteogenic, chondrogenic, or tenogenic derivatives during myogenic differentiation *in vitro*. After 3-week myogenic differentiation, no osteogenic marker OCN (**A**) or chondrogenic marker COLII (**B**) was detected in the FReP cell/MeGC/ColII-hydrogel constructs. Only a minimal number of FReP cells (*yellow arrowheads*) were stained with the tenogenic marker TNMD (**C**). Scale bar = 200  $\mu$ m. MeGC, methacrylated glycol chitosan; OCN, osteocalcin, FReP, fibromodulin-reprogrammed; TNMD, tenomodulin.

**SUPPLEMENTARY TABLE S2.** THE KEY PRINCIPAL COMPONENTS OF POLYMERASE CHAIN REACTION ARRAY

|                        | <i>PC1</i> | <i>PC2</i> | <i>PC3</i> | <i>PC4</i> | <i>PC5</i> | <i>PC6</i> |
|------------------------|------------|------------|------------|------------|------------|------------|
| Standard deviation     | 6.1930     | 3.7160     | 2.79063    | 2.54025    | 1.74045    | 1.33379    |
| Proportion of variance | 0.5689     | 0.1644     | 0.0921     | 0.07682    | 0.03606    | 0.02118    |
| Cumulative proportion  | 0.5689     | 0.7333     | 0.82603    | 0.90285    | 0.93891    | 0.96009    |
